# Supplementary material for: Quality of randomised controlled trials in medical education reported between 2012 and 2013: a systematic review protocol
Source: PubMed Central journal article supplement — BMJ Open. 2014 Jul 30;4(7):e005155. doi: 10.1136/bmjopen-2014-005155 (PMC4120313; doi:10.1136/bmjopen-2014-005155), 2014-07-30
Supplement: bmjopen-2014-005155.draft_revisions.pdf [file bmjopen-2014-005155.draft_revisions.pdf]

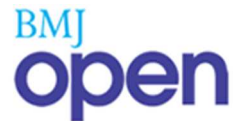

**Quality of randomised controlled trials in medical education reported between 2012 and 2013: A systematic review protocol.**

|                                 |                                                                                                                                                                                                                                                                                                                                                                                                                                                                                                                                                                                                                                                                                                             |
|---------------------------------|-------------------------------------------------------------------------------------------------------------------------------------------------------------------------------------------------------------------------------------------------------------------------------------------------------------------------------------------------------------------------------------------------------------------------------------------------------------------------------------------------------------------------------------------------------------------------------------------------------------------------------------------------------------------------------------------------------------|
| Journal:                        | <i>BMJ Open</i>                                                                                                                                                                                                                                                                                                                                                                                                                                                                                                                                                                                                                                                                                             |
| Manuscript ID:                  | bmjopen-2014-005155                                                                                                                                                                                                                                                                                                                                                                                                                                                                                                                                                                                                                                                                                         |
| Article Type:                   | Protocol                                                                                                                                                                                                                                                                                                                                                                                                                                                                                                                                                                                                                                                                                                    |
| Date Submitted by the Author:   | 28-Feb-2014                                                                                                                                                                                                                                                                                                                                                                                                                                                                                                                                                                                                                                                                                                 |
| Complete List of Authors:       | Tolsgaard, Martin; Copenhagen University Hospital Rigshospitalet, Capital Region of Denmark, Centre for Clinical Education and the Juliane Marie Centre<br>Ku, Cheryl; University of Toronto and University Health Network, The Wilson Centre<br>Woods, Nicole; University of Toronto and University Health Network, Department of Surgery and The Wilson Centre<br>Kulasegaram, Kulamakan; University of Toronto and University Health Network, Department of Family and Community Medicine and The Wilson Centre<br>Brydges, Ryan; University of Toronto and University Health Network, Department of Medicine and The Wilson Centre<br>Ringsted, Charlotte; University Health Network, The Wilson Centre |
| <b>Primary Subject Heading</b>: | Medical education and training                                                                                                                                                                                                                                                                                                                                                                                                                                                                                                                                                                                                                                                                              |
| Secondary Subject Heading:      | Medical publishing and peer review                                                                                                                                                                                                                                                                                                                                                                                                                                                                                                                                                                                                                                                                          |
| Keywords:                       | EDUCATION & TRAINING (see Medical Education & Training), EPIDEMIOLOGY, Health informatics < BIOTECHNOLOGY & BIOINFORMATICS                                                                                                                                                                                                                                                                                                                                                                                                                                                                                                                                                                                  |
|                                 |                                                                                                                                                                                                                                                                                                                                                                                                                                                                                                                                                                                                                                                                                                             |

SCHOLARONE™  
Manuscripts

1  
2  
3  
4  
5 **1 Quality of randomised controlled trials in medical**  
6 **2 education reported between 2012 and 2013: A**  
7 **3 systematic review protocol.**  
8  
9  
10  
11  
12  
13

14 Martin G. Tolsgaard, MD, PhD<sup>1</sup>, Cheryl Ku, MSci<sup>2</sup>, Nicole N. Woods, PhD<sup>3</sup>,  
15 Kulamakan Mahan Kulasegaram, PhD<sup>4</sup>, Ryan Brydges, PhD<sup>5</sup>, Charlotte Ringsted,  
16 MD, PhD, MHPE<sup>6</sup>.  
17

18 <sup>1</sup> Centre for Clinical Education and the Juliane Marie Centre, Copenhagen  
19 University Hospital Rigshospitalet, Denmark.  
20

21 <sup>2</sup> The Wilson Centre, University of Toronto and University Health Network,  
22 Canada.  
23

24 <sup>3</sup> Department of Surgery and The Wilson Centre, University of Toronto and  
25 University Health Network, Canada  
26

27 <sup>4</sup> Department of Family and Community Medicine and The Wilson Centre,  
28 University of Toronto and University Health Network, Canada  
29

30 <sup>5</sup> Department of Medicine and The Wilson Centre, University of Toronto and  
31 University Health Network, Canada  
32

33 <sup>6</sup> Department of Anesthesia and The Wilson Centre, University of Toronto and  
34 University Health Network, Canada  
35

36 Running head: Quality of randomised controlled trials in medical education.  
37  
38  
39

40  
41  
42  
43  
44 Corresponding author:

45 Martin G. Tolsgaard, MD, PhD

46 Postdoctoral research fellow, Centre for Clinical Education and the Juliane Marie  
47 Center, Copenhagen University Hospital Rigshospitalet

48 9 Blegdamsvej, 2100 Copenhagen-O

49 Denmark

50 Tel: +456103072

51 [martintolsgaard@gmail.com](mailto:martintolsgaard@gmail.com)  
52  
53

54  
55 Word count: XXX  
56

57  
58 Keywords: Randomised controlled trials, medical education  
59  
60

## Abstract

*Introduction:* Research in medical education has increased in volume over the last decades but concerns have been raised regarding the quality of trials conducted within this field. Randomised controlled trials (RCTs) involving educational interventions that are reported in biomedical journals have been criticised for insufficient conceptual, theoretical framework. RCTs published in journals dedicated to medical education, on the other hand, have been questioned regarding their methodological rigor.

The aim of this study is therefore to assess the quality of RCTs of educational interventions reported in 2012 and 2013 in journals dedicated to medical education compared to biomedical journals with respect to objective quality criteria.

*Methods and analysis:* RCTs published between 1 January 2012 and 31 December 2013 in English are included. The search strategy is developed by the help of experienced librarians to search online databases for key terms. All of the identified RCTs are screened based on their titles and abstracts individually by the authors and then compared in pairs to assess agreement. Data is extracted from the included RCTs by independently scoring each RCT using a data collection form. The data collection form consists of four steps. Step 1 includes confirmation of RCT eligibility; Step 2 consists of the CONSORT checklist; Step 3 consists of the MERSQI framework; Step 4 consists of a Medical Education Extension (MEdEx) to the CONSORT checklist. The MEdEx includes the following elements: Description of scientific background, explanation of rationale, quality of research questions and hypotheses, clarity in the description of the use of the intervention and control as well as interpretation of results.

*Ethics and Dissemination:* This review is the first to systematically examine the quality of RCTs conducted in medical education. We plan to disseminate the results through publications and presentation at relevant conferences. Ethical approval is not sought for this review.

## Article summary

### *Strengths and Limitations of this study*

#### *Strengths:*

- The first systematic review of the quality of randomised controlled trials in medical education.
- The use of duplicate, independent, and reproducible data coding of quality measures pertaining to research methodology and reporting.

#### *Limitations:*

- To provide a current state of evidence on trial quality, only studies reported from 2012 to 2013 are included in this review.
- Only articles in English are included in this systematic review.

## 93 Introduction

94 Medical education as a field has grown during the past twenty years. It has  
95 become a billion dollar industry accounting for about US\$100 billion per year  
96 worldwide<sup>1</sup> and increasing awareness of linking education to patient outcomes  
97 has brought focus on evidence-based medical education.<sup>2</sup> The growing interest is  
98 reflected in the rise in number of publications within this area over the past  
99 several decades.<sup>3</sup> However, this is not unproblematic, as several scholars have  
100 warned that the medical education research lacks methodological rigor.<sup>3</sup> In a  
101 study of randomised controlled trials (RCTs) published between 2000 and 2003,  
102 a large proportion fell short of the criteria developed by the International  
103 Committee of Medical Journal Editors for reporting RCTs.<sup>4</sup> Meanwhile, some  
104 argue that judging the quality of research being performed in medical education  
105 by any 'objective' checklist is insufficient.<sup>5</sup> Instead, quality of medical education  
106 research should be based on how well the theoretical understanding of a  
107 problem becomes, rather than on how well a particular research methodology  
108 has been adopted. <sup>5</sup> Other viewpoints state that whatever method is used should  
109 comply with the highest standards of practice for that design.<sup>6</sup> Thus, two  
110 discourses of evaluating quality have been promoted. One is assessing quality  
111 against 'gold-standards' such as the checklists and guidelines, and another is  
112 judging the advancement of theory.

113 In clinical epidemiological research, RCTs take on a central role when evaluating  
114 health care interventions. Since 2000, the CONSORT group has provided  
115 guidelines to improve the transparency and rigor when reporting randomised  
116 trials within biomedicine (ref). Although the CONSORT statement does not

1  
2  
3 117 include recommendations for designing, conducting, and analysing trials, it  
4  
5 118 indirectly affects design and conduct as transparent reporting may expose  
6  
7 119 deficiencies in research if they exist<sup>7</sup> Furthermore, CONSORT is informed by  
8  
9  
10 120 methodological theorists and practitioners in clinical epidemiology as well as  
11  
12 121 biostatistics. Assessing quality of RCTs in medical education using the CONSORT  
13  
14 122 statement may, however, not capture advancement of theory. Insufficient use of  
15  
16 123 a conceptual theoretical framework may lead to failure to identify the active  
17  
18 124 component of training interventions and poor description of context of the study  
19  
20  
21 125 as well as trainee characteristics limit the external validity in terms of  
22  
23 126 generalizability to other settings and populations. Reporting should therefore  
24  
25 127 also relate the study to a relevant theoretical context to justify how it uses and  
26  
27 128 advances existing theory<sup>5</sup> including thorough descriptions of context,  
28  
29 129 educational intervention and control circumstances, and trainee characteristics.<sup>8</sup>  
30  
31  
32 130 However, these aspects are not assessed using the CONSORT statement and  
33  
34 131 other measures to evaluate study quality within medical education research may  
35  
36 132 be warranted. To further evolve our understanding of quality of RCTs conducted  
37  
38 133 in medical education, we aim to explore the adherence to standardised quality  
39  
40 134 criteria as well as the use of theory in recent literature. The research question of  
41  
42 135 this review is:  
43  
44  
45  
46 136

47  
48 137 In randomised controlled trials in medical education reported between 2012 and  
49  
50 138 2013, what characterises the quality of papers published in journals dedicated to  
51  
52 139 medical education compared to papers published in biomedical journals with  
53  
54 140 respect to objective quality criteria?  
55  
56  
57 141

## 142 Methods

143 This systematic review is designed according to the seven-step approach  
144 recommended for conducting systematic reviews in medical education<sup>2</sup> and  
145 reported according to the PRISMA statement.<sup>9</sup>

### 147 Study eligibility

148 Broad inclusion criteria are used to obtain a broad range of randomised trials in  
149 medical education. Studies published between 1 January 2012 and 31 December  
150 2013 in English are included. This period is chosen as new guidelines for  
151 reporting randomised trials were published in June 2010 and previous studies  
152 argued that the evaluation of reporting guidelines should first be evaluated 18-  
153 24 months following publication.<sup>10-11</sup> All research papers in medical education  
154 using randomised designs are included. Medical education research is defined as  
155 “any original research study pertaining to medical students, residents, fellows,  
156 faculty development, or continuing medical education for physicians.”<sup>12</sup> Using  
157 this definition, studies on veterinary-, nursing-, pharmacist-, physiotherapist-  
158 and dentistry education research are not eligible. Parallel group studies, cross-  
159 over studies, non-inferiority and equivalence studies are all included whereas  
160 pseudo-randomised studies are not.

### 162 Search

163 The search strategy is developed by the help of experienced librarians to search  
164 MEDLINE, EMBASE, CINAHL, PsychINFO, ERIC, Web of Science, and Scopus for  
165 key terms. These terms include truncated search on random\* and MeSH terms

1  
2  
3 166 relating to medical education (e.g. "Education, Professional"). Related domains  
4  
5 167 are also included in the search to account for research not categorised under  
6  
7 168 medical education (e.g. health professions education, simulation, undergraduate  
8  
9 169 medical education, technology-enhanced education, clinical reasoning, skills  
10  
11 170 assessment, education professional, student health occupation, internship and  
12  
13 171 residency, curriculum planning, instructional method, self-directed learning etc.).  
14  
15 172 The search is supplemented by adding the reference-lists of recent reviews in  
16  
17 173 simulation-based medical education and with authors' records of studies  
18  
19 174 published in the period of interest. The authors' records are used to refine the  
20  
21 175 search strategy in an iterative way so that as many relevant randomised studies  
22  
23 176 as possible are included in the online search.  
24  
25  
26  
27  
28  
29

### 30 31 178 **Study selection**

32  
33 179 All of the identified studies are screened based on their titles and abstracts  
34  
35 180 individually and compared in pairs to assess agreement so that all studies have  
36  
37 181 been screened by two authors. Potential disagreement is solved by discussion  
38  
39 182 until consensus is reached. If the title or abstract is insufficient for determining  
40  
41 183 eligibility, the full text is reviewed. The agreement between the raters is  
42  
43 184 determined using intra-class correlation coefficients (ICCs).  
44  
45  
46  
47  
48  
49

### 50 186 **Data collection process**

51  
52 187 Data is extracted from included studies by duplicate and independent scoring of  
53  
54 188 each study using a data collection form. The data collection form consists of four  
55  
56 189 steps. Step 1 includes confirmation of study eligibility; Step 2 consists of the  
57  
58  
59  
60

1  
2  
3 190 CONSORT checklist; Step 3 consists of the Medical Education Research Study  
4  
5 191 Quality Instrument (MERSQI) framework; Step 4 consists of a Medical Education  
6  
7 192 Extension to the CONSORT statement developed by the review group.  
8

9  
10 193

11  
12 194 *Step 1.* The first step includes confirmation of study eligibility, extraction of  
13  
14 195 Study ID (created by review author) as well as name and focus of journal  
15  
16 196 (medical education/biomedical).

17  
18  
19 197 *Step 2.* The dichotomous CONSORT checklist is completed by ticking off each  
20  
21 198 item when either present (=1), absent (=0), or not applicable (N/A). The  
22  
23 199 CONSORT statement recommends that researchers provide a scientific  
24  
25 200 background for the study as well as present specific objectives and hypothesis,  
26  
27 201 thoroughly describe the intervention and control conditions, randomisation  
28  
29 202 procedure, data analysis and interpretation of results.

30  
31  
32 203 *Step 3.* The Medical Education Research Study Quality Instrument (MERSQI)<sup>12</sup> is  
33  
34 204 used to provide an established measure of study quality and scores are  
35  
36 205 compared in pairs and discussed until consensus. Evidence of validity of the  
37  
38 206 MERSQI framework has been established in a previous study.<sup>12</sup> The MERSQI  
39  
40 207 framework provides a measure of trial size (single- or multiple institutions),  
41  
42 208 validity of assessment instruments used, and the Kirkpatrick level of outcome  
43  
44 209 measures used (a taxonomy for classifying training programmes). Hence, studies  
45  
46 210 of a certain size and focusing on patient outcomes would receive higher scores  
47  
48 211 than single-institution studies that assess the impact of interventions on health  
49  
50 212 care professionals' knowledge or behaviour in a simulated setting.

51  
52  
53 213 *Step 4.* The Medical Education Extension (MEdEx) is developed by the study  
54  
55 214 group through a literature review of relevant quality research in medical  
56  
57  
58  
59  
60



1  
2  
3 215 education. To further advance our understanding of the use of theory in the  
4  
5 216 scientific background of the RCTs, the reporting of specific hypotheses, clarity of  
6  
7 217 description of interventions<sup>13</sup> and controls, and the use of theory in the  
8  
9 218 interpretation of the observed results, we chose to include these factors in a  
10  
11 219 medical education extension (MEdEx) to the CONSORT checklist. In step 4, the  
12  
13 220 following items are therefore included: 1) Scientific background, 2) Explanation  
14  
15 221 of rationale, 3) Objectives or research question, 4) Hypotheses, 5) Description of  
16  
17 222 the intervention and control circumstances, 6) Interpretation of results (see  
18  
19 223 Appendix).  
20  
21  
22  
23  
24

## 25 26 27 225 **Statistical analysis**

28  
29 226 Inter-rater reliability is calculated using Intra-Class Correlation Coefficients. In  
30  
31 227 the event of disagreement, the assessments will be solved by consensus. The  
32  
33 228 CONSORT-scores, MERSQI-scores, and MEdEx-scores are correlated to each  
34  
35 229 other, to journal impact factor, and compared across papers published in  
36  
37 230 journals dedicated to medical education and biomedical journals using  
38  
39 231 parametric statistics if the conditions are met.  
40  
41  
42  
43  
44

## 45 233 **Discussion and dissemination**

46  
47 234 In parallel with the rise in publications in medical education over the last  
48  
49 235 decades, increasing interest is being paid to systematically evaluate the quality of  
50  
51 236 research conducted within this field. We chose to include three different quality  
52  
53 237 measures in the data collection form for this systematic review. To evaluate the  
54  
55 238 quality of reporting, the CONSORT checklist is included as a measure of the  
56  
57  
58  
59  
60

1  
2  
3 239 degree to which current medical education research adhere to the guidelines  
4  
5 240 endorsed by the *World Association of Medical Editors, the International*  
6  
7 241 *Committee of Medical Journal Editors (ICMJE), and the Council of Science Editors.*<sup>14</sup>  
8  
9  
10 242 The second quality measure includes the MERSQI framework, which has been  
11  
12 243 used extensively in several recent reviews.<sup>15-17</sup> Although MERSQI-scores have  
13  
14 244 been shown to correlate with journal impact factor,<sup>12</sup> it provides limited  
15  
16 245 information on the use of theory or clarity in the description of interventions.  
17  
18  
19 246 Hence, to account for the use of conceptual theoretical frameworks in medical  
20  
21 247 education RCTs, we include a third quality measure, the MEdEx,  
22  
23 248  
24  
25 249 We hypothesise that this review may demonstrate differences between different  
26  
27  
28 250 quality measures in RCTs reported in biomedical journals compared to those  
29  
30 251 published in journals dedicated to medical education. We expect that RCTs  
31  
32 252 reported in biomedical journals adhere more strictly to the CONSORT statement  
33  
34 253 and use outcome measures that relate to the upper Kirkpatrick levels than RCTs  
35  
36 254 reported in medical education journals. Finally, we hypothesise that RCTs  
37  
38 255 published in medical education journals use theory in the rationale for their  
39  
40 256 research question, methods, and in their interpretation of the results, whereas  
41  
42 257 this may be missing in research published in biomedical or clinical journals.  
43  
44  
45 258 The review results will be submitted for publication in a peer-reviewed general  
46  
47 259 medical journal and will be disseminated through relevant international  
48  
49 260 conferences.  
50  
51  
52 261 The results of this review will help clarify the state of quality of education  
53  
54 262 research by using common quality standards. The comparative analysis with  
55  
56 263 clinical epidemiology will provide feedback for the medical education  
57  
58  
59  
60

1  
2  
3 264 community and contribute to raising the quality of research and improve the  
4  
5 265 reporting of studies within this field.  
6

7 266  
8

9  
10 267 *Funding statement:* This review has been supported by the Laerdal Foundation.  
11

12 268

13  
14 269 *Competing interest statement:* None disclosed.  
15

16 270  
17

18  
19 271 *Contributors:* All authors contributed to the design of the review and all authors  
20

21 272 contributed and approved the final manuscript.  
22

23 273  
24

25 274  
26

27  
28 275  
29

30  
31 276  
32

33 277  
34

35 278  
36

37  
38 279  
39

40  
41 280  
42

43  
44 281  
45

46 282  
47

48  
49 283  
50

51 284  
52

53  
54 285  
55

56  
57 286  
58  
59  
60

## 287 References

288

289 1) Frenk J, Chen L, Bhutta ZA, Cohen J, Crisp N, Evans T, Fineberg H, Garcia P, Ke  
290 Y, Kelley P, Kistnasamy B, Meleis A, Naylor D, Pablos-Mendez A, Reddy S,  
291 Scrimshaw S, Sepulveda J, Serwadda D, Zurayk H. Health professionals for a new  
292 century: transforming education to strengthen health systems in an  
293 interdependent world. *Lancet*. 2010 Dec 4;376(9756):1923-58.

294

295 2) Cook DA, West CP. Conducting systematic reviews in medical education: a  
296 stepwise approach. *Med Educ*. 2012 Oct;46(10):943-52. doi: 10.1111/j.1365-  
297 2923.2012.04328.x.

298

299 3) Lee K, Whelan JS, Tannery NH, Kanter SL, Peters AS. 50 years of publication in  
300 the field of medical education. *Med Teach*. 2013 Apr 22

301

302 4) Todres M, Stephenson A, Jones R. Medical education research remains the  
303 poor relation. *BMJ* 2007;335:335-5.

304

305 5) Eva KW. *Med Educ*. Broadening the debate about quality in medical education  
306 research. 2009 Apr;43(4):294-6. doi: 10.1111/j.1365-2923.2009.03342.x.

307

308 6) Stephenson A, Todres M, Jones R. Reply to Dornan et al.'s 'On evidence'. *Med*  
309 *Educ*. 2009 Apr;43(4):390-1. doi: 10.1111/j.1365-2923.2009.03306.x.

310

1  
2  
3 311 7) Schulz KF, Altman DG, Moher D; CONSORT Group .CONSORT 2010 statement:  
4  
5 312 updated guidelines for reporting parallel group randomized trials. Ann Intern  
6  
7 313 Med. 2010 Jun 1;152(11):726-32. doi: 10.1059/0003-4819-152-11-201006010-  
8  
9 314 00232. Epub 2010 Mar 24.

11  
12 315

13  
14 316 8) Frambach JM, van der Vleuten CP, Durning SJ. AM last page. Quality criteria in  
15  
16 317 qualitative and quantitative research. Acad Med. 2013 Apr;88(4):552. doi:  
17  
18 318 10.1097/ACM.0b013e31828abf7f.

19  
20  
21 319

22  
23 320 9) Prisma statement, available at [www.prisma-statement.org](http://www.prisma-statement.org). Accessed 5  
24  
25 321 January 2014.

26  
27  
28 322

29  
30 323 10) Prady SL, Richmond SJ, Morton VM, et al. A Systematic evaluation of the  
31  
32 324 impact of STRICTA and CONSORT recommendations on quality of reporting for  
33  
34 325 acupuncture trials. PLoS One 2008;3:e1577.

35  
36  
37 326

38  
39 327 11) Fuller T, Pearson M, Peters JL, Anderson R. Evaluating the impact and use of  
40  
41 328 Transparent Reporting of Evaluations with Non-randomised Designs (TREND)  
42  
43 329 reporting guidelines. BMJ Open. 2012 Dec 19;2(6). pii: e002073. doi:  
44  
45 330 10.1136/bmjopen-2012-002073. Print 2012.

46  
47  
48 331

49  
50 332 12) Reed DA, Cook DA, Beckman TJ, Levine RB, Kern DE, Wright SM. Association  
51  
52 333 between funding and quality of published medical education research. JAMA.  
53  
54 334 2007 Sep 5;298(9):1002-9.

55  
56  
57 335  
58  
59  
60

- 1  
2  
3 336 13) Hoffmann TC, Eructi C, Glasziou PP. Poor description of non-pharmacological  
4  
5 337 interventions: analysis of consecutive sample of randomised trials. BMJ. 2013  
6  
7 338 Sep 10;347:f3755. doi: 10.1136/bmj.f3755  
8  
9 339  
10  
11 340 14) Altman DG. Endorsement of the CONSORT statement by high impact medical  
12  
13 341 journals: survey of instructions for authors. BMJ. 2005 May 7;330(7499):1056-7.  
14  
15 342  
16  
17 343 15) Cook DA, Hatala R, Brydges R, Zendejas B, Szostek JH, Wang AT, Erwin PJ,  
18  
19 344 Hamstra SJ. Technology-enhanced simulation for health professions education: a  
20  
21 345 systematic review and meta-analysis. JAMA. 2011 Sep 7;306(9):978-88. doi:  
22  
23 346 10.1001/jama.2011.1234. Review.  
24  
25 347  
26  
27 348 16) Cook DA, Brydges R, Zendejas B, Hamstra SJ, Hatala R. Mastery learning for  
28  
29 349 health professionals using technology-enhanced simulation: a systematic review  
30  
31 350 and meta-analysis. Acad Med. 2013 Aug;88(8):1178-86. doi:  
32  
33 351 10.1097/ACM.0b013e31829a365d. Review.  
34  
35 352  
36  
37 353 17) Cook DA, Levinson AJ, Garside S. Method and reporting quality in health  
38  
39 354 professions education research: a systematic review. Med Educ. 2011  
40  
41 355 Mar;45(3):227-38. doi: 10.1111/j.1365-2923.2010.03890.x.  
42  
43 356  
44  
45 357  
46  
47  
48  
49  
50  
51  
52  
53  
54  
55  
56  
57  
58  
59  
60

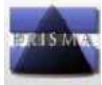

# PRISMA 2009 Checklist

1  
2  
3  
4  
5  
6  
7  
8  
9  
10  
11  
12  
13  
14  
15  
16  
17  
18  
19  
20  
21  
22  
23  
24  
25  
26  
27  
28  
29  
30  
31  
32  
33  
34  
35  
36  
37  
38  
39  
40  
41  
42  
43  
44  
45  
46  
47  
48  
49

| Section/topic             | #  | Checklist item                                                                                                                                                                                                                                                                                              | Reported on page #                                                                   |
|---------------------------|----|-------------------------------------------------------------------------------------------------------------------------------------------------------------------------------------------------------------------------------------------------------------------------------------------------------------|--------------------------------------------------------------------------------------|
| <b>TITLE</b>              |    |                                                                                                                                                                                                                                                                                                             |                                                                                      |
| Title                     | 1  | Identify the report as a systematic review, meta-analysis, or both.                                                                                                                                                                                                                                         | 1                                                                                    |
| <b>ABSTRACT</b>           |    |                                                                                                                                                                                                                                                                                                             |                                                                                      |
| Structured summary        | 2  | Provide a structured summary including, as applicable: background; objectives; data sources; study eligibility criteria, participants, and interventions; study appraisal and synthesis methods; results; limitations; conclusions and implications of key findings; systematic review registration number. | 2                                                                                    |
| <b>INTRODUCTION</b>       |    |                                                                                                                                                                                                                                                                                                             |                                                                                      |
| Rationale                 | 3  | Describe the rationale for the review in the context of what is already known.                                                                                                                                                                                                                              | 3                                                                                    |
| Objectives                | 4  | Provide an explicit statement of questions being addressed with reference to participants, interventions, comparisons, outcomes, and study design (PICOS).                                                                                                                                                  | 4                                                                                    |
| <b>METHODS</b>            |    |                                                                                                                                                                                                                                                                                                             |                                                                                      |
| Protocol and registration | 5  | Indicate if a review protocol exists, if and where it can be accessed (e.g., Web address), and, if available, provide registration information including registration number.                                                                                                                               | N/A – not subject for registration with PROSPERO as this is a methodological review. |
| Eligibility criteria      | 6  | Specify study characteristics (e.g., PICOS, length of follow-up) and report characteristics (e.g., years considered, language, publication status) used as criteria for eligibility, giving rationale.                                                                                                      | 4                                                                                    |
| Information sources       | 7  | Describe all information sources (e.g., databases with dates of coverage, contact with study authors to identify additional studies) in the search and date last searched.                                                                                                                                  | 5                                                                                    |
| Search                    | 8  | Present full electronic search strategy for at least one database, including any limits used, such that it could be repeated.                                                                                                                                                                               | 6                                                                                    |
| Study selection           | 9  | State the process for selecting studies (i.e., screening, eligibility, included in systematic review, and, if applicable, included in the meta-analysis).                                                                                                                                                   | 6                                                                                    |
| Data collection process   | 10 | Describe method of data extraction from reports (e.g., piloted forms, independently, in duplicate) and any processes for obtaining and confirming data from investigators.                                                                                                                                  | 7                                                                                    |
| Data items                | 11 | List and define all variables for which data were sought (e.g., PICOS, funding sources) and any assumptions and simplifications made.                                                                                                                                                                       | 8                                                                                    |

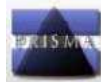

# PRISMA 2009 Checklist

Page 1 of 2

|   |                                    |    |                                                                                                                                                                                                                        |     |
|---|------------------------------------|----|------------------------------------------------------------------------------------------------------------------------------------------------------------------------------------------------------------------------|-----|
| 4 | Risk of bias in individual studies | 12 | Describe methods used for assessing risk of bias of individual studies (including specification of whether this was done at the study or outcome level), and how this information is to be used in any data synthesis. | 8   |
| 7 | Summary measures                   | 13 | State the principal summary measures (e.g., risk ratio, difference in means).                                                                                                                                          | 8   |
| 8 | Synthesis of results               | 14 | Describe the methods of handling data and combining results of studies, if done, including measures of consistency (e.g., $I^2$ ) for each meta-analysis.                                                              | N/A |

Page 1 of 2

| Section/topic     | #                             | Checklist item | Reported on page #                                                                                                                                                                                       |     |
|-------------------|-------------------------------|----------------|----------------------------------------------------------------------------------------------------------------------------------------------------------------------------------------------------------|-----|
| 15                | Risk of bias across studies   | 15             | Specify any assessment of risk of bias that may affect the cumulative evidence (e.g., publication bias, selective reporting within studies).                                                             | 8   |
| 18                | Additional analyses           | 16             | Describe methods of additional analyses (e.g., sensitivity or subgroup analyses, meta-regression), if done, indicating which were pre-specified.                                                         | N/A |
| <b>RESULTS</b>    |                               |                |                                                                                                                                                                                                          |     |
| 22                | Study selection               | 17             | Give numbers of studies screened, assessed for eligibility, and included in the review, with reasons for exclusions at each stage, ideally with a flow diagram.                                          | N/A |
| 24                | Study characteristics         | 18             | For each study, present characteristics for which data were extracted (e.g., study size, PICOS, follow-up period) and provide the citations.                                                             | N/A |
| 27                | Risk of bias within studies   | 19             | Present data on risk of bias of each study and, if available, any outcome level assessment (see item 12).                                                                                                | N/A |
| 28                | Results of individual studies | 20             | For all outcomes considered (benefits or harms), present, for each study: (a) simple summary data for each intervention group (b) effect estimates and confidence intervals, ideally with a forest plot. | N/A |
| 31                | Synthesis of results          | 21             | Present results of each meta-analysis done, including confidence intervals and measures of consistency.                                                                                                  | N/A |
| 32                | Risk of bias across studies   | 22             | Present results of any assessment of risk of bias across studies (see Item 15).                                                                                                                          | N/A |
| 34                | Additional analysis           | 23             | Give results of additional analyses, if done (e.g., sensitivity or subgroup analyses, meta-regression [see Item 16]).                                                                                    | N/A |
| <b>DISCUSSION</b> |                               |                |                                                                                                                                                                                                          |     |
| 37                | Summary of evidence           | 24             | Summarize the main findings including the strength of evidence for each main outcome; consider their relevance to key groups (e.g., healthcare providers, users, and policy makers).                     | N/A |
| 40                | Limitations                   | 25             | Discuss limitations at study and outcome level (e.g., risk of bias), and at review-level (e.g., incomplete retrieval of identified research, reporting bias).                                            | N/A |
| 42                | Conclusions                   | 26             | Provide a general interpretation of the results in the context of other evidence, and implications for future research.                                                                                  | N/A |
| <b>FUNDING</b>    |                               |                |                                                                                                                                                                                                          |     |



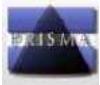

# PRISMA 2009 Checklist

|   |         |    |                                                                                                                                            |    |
|---|---------|----|--------------------------------------------------------------------------------------------------------------------------------------------|----|
| 4 | Funding | 27 | Describe sources of funding for the systematic review and other support (e.g., supply of data); role of funders for the systematic review. | 10 |
|---|---------|----|--------------------------------------------------------------------------------------------------------------------------------------------|----|

8 *From:* Moher D, Liberati A, Tetzlaff J, Altman DG, The PRISMA Group (2009). Preferred Reporting Items for Systematic Reviews and Meta-Analyses: The PRISMA Statement. PLoS Med 6(6): e1000097.  
doi:10.1371/journal.pmed1000097

9 For more information, visit: [www.prisma-statement.org](http://www.prisma-statement.org).

11 Page 2 of 2

For peer review only

# BMJ Open

## Quality of randomised controlled trials in medical education reported between 2012 and 2013: A systematic review protocol.

|                                 |                                                                                                                                                                                                                                                                                                                                                                                                                                                                                                                                                                                                                                                                                                             |
|---------------------------------|-------------------------------------------------------------------------------------------------------------------------------------------------------------------------------------------------------------------------------------------------------------------------------------------------------------------------------------------------------------------------------------------------------------------------------------------------------------------------------------------------------------------------------------------------------------------------------------------------------------------------------------------------------------------------------------------------------------|
| Journal:                        | <i>BMJ Open</i>                                                                                                                                                                                                                                                                                                                                                                                                                                                                                                                                                                                                                                                                                             |
| Manuscript ID:                  | bmjopen-2014-005155.R1                                                                                                                                                                                                                                                                                                                                                                                                                                                                                                                                                                                                                                                                                      |
| Article Type:                   | Protocol                                                                                                                                                                                                                                                                                                                                                                                                                                                                                                                                                                                                                                                                                                    |
| Date Submitted by the Author:   | 14-Jul-2014                                                                                                                                                                                                                                                                                                                                                                                                                                                                                                                                                                                                                                                                                                 |
| Complete List of Authors:       | Tolsgaard, Martin; Copenhagen University Hospital Rigshospitalet, Capital Region of Denmark, Centre for Clinical Education and the Juliane Marie Centre<br>Ku, Cheryl; University of Toronto and University Health Network, The Wilson Centre<br>Woods, Nicole; University of Toronto and University Health Network, Department of Surgery and The Wilson Centre<br>Kulasegaram, Kulamakan; University of Toronto and University Health Network, Department of Family and Community Medicine and The Wilson Centre<br>Brydges, Ryan; University of Toronto and University Health Network, Department of Medicine and The Wilson Centre<br>Ringsted, Charlotte; University Health Network, The Wilson Centre |
| <b>Primary Subject Heading</b>: | Medical education and training                                                                                                                                                                                                                                                                                                                                                                                                                                                                                                                                                                                                                                                                              |
| Secondary Subject Heading:      | Medical publishing and peer review                                                                                                                                                                                                                                                                                                                                                                                                                                                                                                                                                                                                                                                                          |
| Keywords:                       | EDUCATION & TRAINING (see Medical Education & Training), EPIDEMIOLOGY, Health informatics < BIOTECHNOLOGY & BIOINFORMATICS                                                                                                                                                                                                                                                                                                                                                                                                                                                                                                                                                                                  |
|                                 |                                                                                                                                                                                                                                                                                                                                                                                                                                                                                                                                                                                                                                                                                                             |

SCHOLARONE™  
Manuscripts

1  
2  
3  
4  
5 **1 Quality of randomised controlled trials in medical**  
6 **2 education reported between 2012 and 2013: A**  
7 **3 systematic review protocol.**  
8  
9  
10  
11  
12

13 7 Martin G. Tolsgaard, MD, PhD<sup>1</sup>, Cheryl Ku, MSci<sup>2</sup>, Nicole N. Woods, PhD<sup>3</sup>,  
14 8 Kulamakan Mahan Kulasegaram, PhD<sup>4</sup>, Ryan Brydges, PhD<sup>5</sup>, Charlotte Ringsted,  
15 9 MD, PhD, MHPE<sup>7</sup>.

16  
17  
18 1 Centre for Clinical Education and the Juliane Marie Centre, Copenhagen  
19 12 University Hospital Rigshospitalet, Denmark.

20  
21 2 The Wilson Centre, University of Toronto and University Health Network,  
22 15 Canada.

23  
24 3 Department of Surgery and The Wilson Centre, University of Toronto and  
25 18 University Health Network, Canada

26  
27  
28 4 Department of Family and Community Medicine and The Wilson Centre,  
29 21 University of Toronto and University Health Network, Canada

30  
31 5 Department of Medicine and The Wilson Centre, University of Toronto and  
32 24 University Health Network, Canada

33  
34 6 Surgical Divisions, Neuroscience, & Medical Education, Health Sciences Library,  
35 27 University Health Network, Toronto General Hospital, Canada.

36  
37  
38 7 Department of Anesthesia and The Wilson Centre, University of Toronto and  
39 30 University Health Network, Canada

40  
41 32 Running head: Quality of randomised controlled trials in medical education.  
42 33

43 34 Conflicts of interest: None of the authors report any conflicts of interest.  
44 35

45  
46 36 Corresponding author:

47 37 Martin G. Tolsgaard, MD, PhD

48 38 Postdoctoral research fellow, Centre for Clinical Education and the Juliane Marie  
49 39 Center, Copenhagen University Hospital Rigshospitalet

50 40 9 Blegdamsvej, 2100 Copenhagen-O

51 41 Denmark

52 42 Tel: +456103072

53 43 [martintolsgaard@gmail.com](mailto:martintolsgaard@gmail.com)  
54 44

55  
56  
57 46 Word count: XXX

58 47 Keywords: Randomised controlled trials, medical education  
59  
60

## Abstract

*Introduction:* Research in medical education has increased in volume over the last decades but concerns have been raised regarding the quality of trials conducted within this field. Randomised controlled trials (RCTs) involving educational interventions that are reported in biomedical journals have been criticised for insufficient conceptual, theoretical framework. RCTs published in journals dedicated to medical education, on the other hand, have been questioned regarding their methodological rigor.

The aim of this study is therefore to assess the quality of RCTs of educational interventions reported in 2012 and 2013 in journals dedicated to medical education compared to biomedical journals with respect to objective quality criteria.

*Methods and analysis:* RCTs published between 1 January 2012 and 31 December 2013 in English are included. The search strategy is developed by the help of experienced librarians to search online databases for key terms. All of the identified RCTs are screened based on their titles and abstracts individually by the authors and then compared in pairs to assess agreement. Data is extracted from the included RCTs by independently scoring each RCT using a data collection form. The data collection form consists of four steps. Step 1 includes confirmation of RCT eligibility; Step 2 consists of the CONSORT checklist; Step 3 consists of the MERSQI framework; Step 4 consists of a Medical Education Extension (MEdEx) to the CONSORT checklist. The MEdEx includes the following elements: Description of scientific background, explanation of rationale, quality of research questions and hypotheses, clarity in the description of the use of the intervention and control as well as interpretation of results.

*Ethics and Dissemination:* This review is the first to systematically examine the quality of RCTs conducted in medical education. We plan to disseminate the results through publications and presentation at relevant conferences. Ethical approval is not sought for this review.

## Article summary

### *Strengths and Limitations of this study*

#### *Strengths:*

- The first systematic review of the quality of randomised controlled trials in medical education.
- The use of duplicate, independent, and reproducible data coding of quality measures pertaining to research methodology and reporting.

#### *Limitations:*

- To provide a current state of evidence on trial quality, only studies reported from 2012 to 2013 are included in this review.
- Only articles in English are included in this systematic review.

## 93 Introduction

94 Medical education as a field has grown during the past twenty years. It has  
95 become a billion dollar industry accounting for about US\$100 billion per year  
96 worldwide<sup>1</sup> and increasing awareness of linking education to patient outcomes  
97 has brought focus on evidence-based medical education.<sup>2</sup> The growing interest is  
98 reflected in the rise in number of publications within this area over the past  
99 several decades.<sup>3</sup> However, this is not unproblematic, as several scholars have  
100 warned that the medical education research lacks methodological rigor.<sup>3</sup> In a  
101 study of randomised controlled trials (RCTs) published between 2000 and 2003,  
102 a large proportion fell short of the criteria developed by the International  
103 Committee of Medical Journal Editors for reporting RCTs.<sup>4</sup> Meanwhile, some  
104 argue that judging the quality of research being performed in medical education  
105 by any 'objective' checklist is insufficient.<sup>5</sup> Instead, quality of medical education  
106 research should be based on the advancement of our theoretical understanding,  
107 rather than on how well a particular research methodology has been adopted.<sup>5</sup>  
108 Other viewpoints state that whatever method is used should comply with the  
109 highest standards of practice for that design.<sup>6</sup> Thus, two discourses of evaluating  
110 quality have been promoted. One is assessing quality against 'gold-standards'  
111 such as the checklists and guidelines, and another is judging the advancement of  
112 theory.

113 In clinical epidemiological research, RCTs take on a central role when evaluating  
114 health care interventions. Since 2000, the CONSORT group has provided  
115 guidelines to improve the transparency and rigor when reporting randomised  
116 trials within biomedicine.<sup>7</sup> Although the CONSORT statement does not include

1  
2  
3 117 recommendations for designing, conducting, and analysing trials, it indirectly  
4  
5 118 affects design and conduct as transparent reporting may expose deficiencies in  
6  
7 119 research if they exist<sup>7</sup> Furthermore, CONSORT is informed by methodological  
8  
9  
10 120 theorists and practitioners in clinical epidemiology as well as biostatistics.  
11  
12 121 Assessing quality of RCTs in medical education using the CONSORT statement  
13  
14 122 may, however, not capture advancement of theory. Insufficient use of a  
15  
16 123 conceptual theoretical framework may lead to failure to identify the active  
17  
18 124 component of training interventions. Furthermore, poor description of context of  
19  
20 125 the study as well as trainee characteristics limit the external validity in terms of  
21  
22 126 generalizability to other settings and populations. Reporting should therefore  
23  
24 127 also relate the study to a relevant theoretical context to justify how it uses and  
25  
26 128 advances existing theory<sup>5</sup> including thorough descriptions of context,  
27  
28 129 educational intervention and control circumstances, and trainee characteristics.<sup>8</sup>  
29  
30  
31 130 However, these aspects are not assessed using the CONSORT statement and  
32  
33 131 other measures to evaluate study quality within medical education research may  
34  
35 132 be warranted. To further evolve our understanding of quality of RCTs conducted  
36  
37 133 in medical education, we aim to explore the adherence to standardised quality  
38  
39 134 criteria as well as the use of theory in recent literature. The research question of  
40  
41 135 this review is:  
42  
43  
44  
45  
46 136

47  
48 137 In randomised controlled trials in medical education reported between 2012 and  
49  
50 138 2013, what characterises the quality of papers published in journals dedicated to  
51  
52 139 medical education compared to papers published in biomedical journals with  
53  
54 140 respect to objective quality criteria?  
55  
56  
57  
58 141

## 142 Methods

143 This systematic review is designed according to the seven-step approach  
144 recommended for conducting systematic reviews in medical education<sup>2</sup> and  
145 reported according to the PRISMA statement.<sup>9</sup>

### 147 Study eligibility

148 Broad inclusion criteria are used to obtain a broad range of randomised trials in  
149 medical education. Studies published between 1 January 2012 and 31 December  
150 2013 in English are included. This period is chosen as new guidelines for  
151 reporting randomised trials were published in June 2010 and previous studies  
152 argued that the evaluation of reporting guidelines should first be evaluated 18-  
153 24 months following publication.<sup>10-11</sup> All research papers in medical education  
154 using randomised designs are included. Medical education research is defined as  
155 “any original research study pertaining to medical students, residents, fellows,  
156 faculty development, or continuing medical education for physicians.”<sup>12</sup> Using  
157 this definition, studies on veterinary-, nursing-, pharmacist-, physiotherapist-  
158 and dentistry education research are not eligible. Parallel group studies, cross-  
159 over studies, non-inferiority and equivalence studies are all included whereas  
160 pseudo-randomised studies are not.

### 162 Search

163 The search strategy is developed by the help of experienced librarians to search  
164 MEDLINE, EMBASE, CINAHL, PsychINFO, ERIC, Web of Science, and Scopus for  
165 key terms. These terms include truncated search on random\* and MeSH terms

1  
2  
3 166 relating to medical education (e.g. "Education, Professional"). Related domains  
4  
5 167 are also included in the search to account for research not categorised under  
6  
7 168 medical education (e.g. health professions education, simulation, undergraduate  
8  
9 169 medical education, technology-enhanced education, clinical reasoning, skills  
10  
11 170 assessment, education professional, student health occupation, internship and  
12  
13 171 residency, curriculum planning, instructional method, self-directed learning etc.).  
14  
15 172 The search is supplemented by adding the reference-lists of recent reviews in  
16  
17 173 simulation-based medical education and with authors' records of studies  
18  
19 174 published in the period of interest. The authors' records are used to refine the  
20  
21 175 search strategy in an iterative way so that as many relevant randomised studies  
22  
23 176 as possible are included in the online search.  
24  
25  
26  
27  
28  
29

### 30 31 178 **Study selection**

32  
33 179 All of the identified studies are screened based on their titles and abstracts  
34  
35 180 individually and compared in pairs to assess agreement so that all studies have  
36  
37 181 been screened by two authors. Potential disagreement is solved by discussion  
38  
39 182 until consensus is reached. If the title or abstract is insufficient for determining  
40  
41 183 eligibility, the full text is reviewed. If consensus cannot be reached by two of the  
42  
43 184 co-authors, the whole author team will decide whether to include the paper or  
44  
45 185 not. The agreement between the raters is determined using intra-class  
46  
47 186 correlation coefficients (ICCs).  
48  
49  
50

51 187  
52  
53  
54  
55  
56  
57  
58  
59  
60



1  
2  
3 188 **Data collection process**  
4

5 189 Data is extracted from included studies by duplicate and independent scoring of  
6  
7 190 each study using a data collection form. The data collection form consists of four  
8  
9  
10 191 steps. Step 1 includes confirmation of study eligibility; Step 2 consists of the  
11  
12 192 CONSORT checklist; Step 3 consists of the Medical Education Research Study  
13  
14 193 Quality Instrument (MERSQI) framework; Step 4 consists of a Medical Education  
15  
16 194 Extension to the CONSORT statement developed by the review group.  
17  
18

19 195

20  
21 196 *Step 1.* The first step includes confirmation of study eligibility, extraction of  
22  
23 197 Study ID (created by review author) as well as name and focus of journal  
24  
25 198 (medical education/biomedical).  
26

27  
28 199 *Step 2.* The dichotomous CONSORT checklist is completed by ticking off each  
29  
30 200 item when either present (=1), absent (=0), or not applicable (N/A). The  
31  
32 201 CONSORT statement recommends that researchers provide a scientific  
33  
34 202 background for the study as well as present specific objectives and hypothesis,  
35  
36 203 thoroughly describe the intervention and control conditions, randomisation  
37  
38 204 procedure, data analysis and interpretation of results.  
39

40  
41 205 *Step 3.* The Jadad Scale for reporting randomised trials<sup>13</sup> is used to assess the  
42  
43 206 methodological rigor of the included studies. The Jadad scale consists of three  
44  
45 207 items pertaining to randomisation procedure, blinding, and participant  
46  
47 208 withdrawal or dropouts.  
48

49  
50 209 *Step 4.* The Medical Education Research Study Quality Instrument (MERSQI)<sup>12</sup> is  
51  
52 210 used to provide an established measure of study quality and scores are  
53  
54 211 compared in pairs and discussed until consensus. Evidence of validity of the  
55  
56 212 MERSQI framework has been established in a previous study.<sup>12</sup> The MERSQI  
57  
58  
59  
60

1  
2  
3 213 framework provides a measure of trial size (single- or multiple institutions),  
4  
5 214 validity of assessment instruments used, and the Kirkpatrick level of outcome  
6  
7 215 measures used (a taxonomy for classifying training programmes). Hence, studies  
8  
9 216 of a certain size and focusing on patient outcomes would receive higher scores  
10  
11 217 than single-institution studies that assess the impact of interventions on health  
12  
13 218 care professionals' knowledge or behaviour in a simulated setting.

14  
15  
16 219 *Step 5.* The Medical Education Extension (MEdEx) is developed by the study  
17  
18 220 group through a literature review of relevant quality research in medical  
19  
20 221 education. To further advance our understanding of the use of theory in the  
21  
22 222 scientific background of the RCTs, the reporting of specific hypotheses, clarity of  
23  
24 223 description of interventions<sup>14</sup> and controls, and the use of theory in the  
25  
26 224 interpretation of the observed results, we chose to include these factors in a  
27  
28 225 medical education extension (MEdEx) to the CONSORT checklist. In step 4, the  
29  
30 226 following items are therefore included: 1) Scientific background,<sup>5</sup> 2) Explanation  
31  
32 227 of rationale,<sup>5</sup> 3) Objectives or research question,<sup>4, 6</sup> 4) Hypotheses,<sup>4, 6</sup> 5)  
33  
34 228 Description of the intervention and control circumstances,<sup>6, 8, 14</sup> 6)  
35  
36 229 Interpretation<sup>4, 5, 12</sup> of results (see Appendix).

37  
38  
39  
40  
41 230

### 42 43 44 231 **Statistical analysis**

45  
46 232 Inter-rater reliability is calculated using Intra-Class Correlation Coefficients. In  
47  
48 233 the event of disagreement, the assessments will be solved by consensus.  
49  
50 234 Descriptive statistics for each of the three different quality measures will be  
51  
52 235 performed. Logistic regression will be performed using journal type as  
53  
54 236 dependent and CONSORT-scores, MERSQI-scores, and MEdEx-scores as

1  
2  
3 237 predictor variables. Multiple regression using the same predictor variables and  
4  
5 238 journal impact factor will also be performed to assess the relation between  
6  
7 239 quality measures and journal impact factor.  
8

9  
10 240

## 11 241 Discussion and dissemination

12  
13  
14  
15 242 In parallel with the rise in publications in medical education over the last  
16  
17 243 decades, increasing interest is being paid to systematically evaluate the quality of  
18  
19 244 research conducted within this field. We chose to include three different quality  
20  
21 245 measures in the data collection form for this systematic review. To evaluate the  
22  
23 246 quality of reporting, the CONSORT checklist is included as a measure of the  
24  
25 247 degree to which current medical education research adhere to the guidelines  
26  
27 248 endorsed by the *World Association of Medical Editors*, the *International*  
28  
29 249 *Committee of Medical Journal Editors (ICMJE)*, and the *Council of Science Editors*.<sup>15</sup>  
30  
31

32  
33 250 The second quality measure includes the MERSQI framework, which has been  
34  
35 251 used extensively in several recent reviews.<sup>16-18</sup> Although MERSQI-scores have  
36  
37 252 been shown to correlate with journal impact factor,<sup>12</sup> it provides limited  
38  
39 253 information on the use of theory or clarity in the description of interventions.  
40  
41 254 Hence, to account for the use of conceptual theoretical frameworks in medical  
42  
43 255 education RCTs, we plan to include a third quality measure in terms of the  
44  
45 256 MEdEx framework.  
46  
47

48  
49 257

50  
51 258 We hypothesise that this review may demonstrate differences between different  
52  
53 259 quality measures in RCTs reported in biomedical journals compared to those  
54  
55 260 published in journals dedicated to medical education. We expect that RCTs  
56  
57  
58  
59  
60

1  
2  
3 261 reported in biomedical journals adhere more strictly to the CONSORT statement  
4  
5 262 and use outcome measures that relate to the upper Kirkpatrick levels than RCTs  
6  
7 263 reported in medical education journals. Finally, we hypothesise that RCTs  
8  
9 264 published in medical education journals use theory in the rationale for their  
10  
11 265 research question, methods, and in their interpretation of the results, whereas  
12  
13 266 this may be missing in research published in biomedical or clinical journals.  
14  
15

16 267 The review results will be submitted for publication in a peer-reviewed general  
17  
18 268 medical journal and will be disseminated through relevant international  
19  
20 269 conferences.  
21  
22

23 270 The results of this review will help clarify the state of quality of education  
24  
25 271 research by using common quality standards. The comparative analysis with  
26  
27 272 clinical epidemiology will provide feedback for medical education researchers  
28  
29 273 and contribute to raising the quality of research and improve the reporting of  
30  
31 274 studies within this field.  
32  
33

34 275

35 276

36 277

37 278

38 279

39 280

40 281

41 282

42 283

43 284

44 285

1  
2  
3 286  
4

5 287 **Funding statement:** This review has been supported by the Laerdal Foundation.  
6  
7

8 288  
9

10 289 **Competing interest statement:** None disclosed.  
11  
12

13 290

14 291 **Contribution statement:** All authors contributed to the design of the review and  
15  
16

17 292 all authors contributed and approved the final manuscript. Everyone listed as an  
18

19 293 author fulfils all three of the ICMJE guidelines for authorship. MGT and CR were  
20

21 294 responsible for conception of the review. CK, KMK, RB, NW, MGT, and CR were  
22

23 295 responsible for designing the review and the MEdEx. MGT drafted the first  
24

25 296 version of the protocol and CK, RB, NW, KMK, and CR were critically revised the  
26

27 297 paper.  
28  
29

30 298  
31

32 299  
33  
34

35 300  
36  
37

38 301  
39

40 302  
41  
42

43 303  
44  
45

46 304  
47  
48

49 305  
50

51 306  
52  
53

54 307  
55

56 308  
57  
58  
59  
60

## 309 References

- 1  
2  
3  
4  
5  
6 310 1) Frenk J, Chen L, Bhutta ZA, et al. Health professionals for a new century:  
7  
8 311 transforming education to strengthen health systems in an interdependent  
9  
10 312 world. *Lancet*. 2010 Dec 4;376(9756):1923-58.
- 11 313 2) Cook DA, West CP. Conducting systematic reviews in medical education: a  
12  
13 314 stepwise approach. *Med Educ*. 2012 Oct;46(10):943-52. doi: 10.1111/j.1365-  
14  
15 315 2923.2012.04328.x.
- 16 316 3) Lee K, Whelan JS, Tannery NH, et al. 50 years of publication in the field of  
17  
18 317 medical education. *Med Teach*. 2013 Apr 22
- 19 318 4) Todres M, Stephenson A, Jones R. Medical education research remains the  
20  
21 319 poor relation. *BMJ* 2007;335:335-5.
- 22 320 5) Eva KW. *Med Educ*. Broadening the debate about quality in medical education  
23  
24 321 research. 2009 Apr;43(4):294-6. doi: 10.1111/j.1365-2923.2009.03342.x.
- 25 322 6) Stephenson A, Todres M, Jones R. Reply to Dornan et al.'s 'On evidence'. *Med*  
26  
27 323 *Educ*. 2009 Apr;43(4):390-1. doi: 10.1111/j.1365-2923.2009.03306.x.
- 28 324 7) Schulz KF, Altman DG, Moher D; CONSORT Group .CONSORT 2010 statement:  
29  
30 325 updated guidelines for reporting parallel group randomized trials. *Ann Intern*  
31  
32 326 *Med*. 2010 Jun 1;152(11):726-32. doi: 10.1059/0003-4819-152-11-201006010-  
33  
34 327 00232. Epub 2010 Mar 24.
- 35 328 8) Frambach JM, van der Vleuten CP, et al. AM last page. Quality criteria in  
36  
37 329 qualitative and quantitative research. *Acad Med*. 2013 Apr;88(4):552. doi:  
38  
39 330 10.1097/ACM.0b013e31828abf7f.
- 40 331
- 41 332 9) Prisma statement, available at [www.prisma-statement.org](http://www.prisma-statement.org). Accessed 5  
42  
43 333 January 2014.
- 44 334 10) Prady SL, Richmond SJ, Morton VM, et al. A Systematic evaluation of the  
45  
46 335 impact of STRICTA and CONSORT recommendations on quality of reporting for  
47  
48 336 acupuncture trials. *PLoS One* 2008;3:e1577.
- 49 337 11) Fuller T, Pearson M, Peters JL, et al. Evaluating the impact and use of  
50  
51 338 Transparent Reporting of Evaluations with Non-randomised Designs (TREND)  
52  
53 339 reporting guidelines. *BMJ Open*. 2012 Dec 19;2(6). pii: e002073. doi:  
54  
55 340 10.1136/bmjopen-2012-002073. Print 2012.
- 56  
57  
58  
59  
60

- 1  
2  
3 341 12) Reed DA, Cook DA, Beckman TJ, et al. SM. Association between funding and  
4 342 quality of published medical education research. JAMA. 2007 Sep 5;298(9):1002-  
5 343 9.  
6  
7 344  
8  
9 345 13) Jadad AR1, Moore RA, Carroll D, et al. Assessing the quality of reports of  
10 346 randomized clinical trials: is blinding necessary? Control Clin Trials.  
11 347 1996;17(1):1-12.  
12  
13 348  
14  
15 349 14) Hoffmann TC, Eructi C, Glasziou PP. Poor description of non-pharmacological  
16 350 interventions: analysis of consecutive sample of randomised trials. BMJ. 2013  
17 351 Sep 10;347:f3755. doi: 10.1136/bmj.f3755  
18 352  
19  
20 353 15) Altman DG. Endorsement of the CONSORT statement by high impact medical  
21 354 journals: survey of instructions for authors. BMJ. 2005 May 7;330(7499):1056-7.  
22 355  
23  
24 356 16) Cook DA, Hatala R, Brydges R, et al. Technology-enhanced simulation for  
25 357 health professions education: a systematic review and meta-analysis. JAMA.  
26 358 2011 Sep 7;306(9):978-88. doi: 10.1001/jama.2011.1234.  
27 359  
28  
29 360 17) Cook DA, Brydges R, Zendejas B, et al. Mastery learning for health  
30 361 professionals using technology-enhanced simulation: a systematic review and  
31 362 meta-analysis. Acad Med. 2013 Aug;88(8):1178-86. doi:  
32 363 10.1097/ACM.0b013e31829a365d.  
33 364  
34  
35 365 18) Cook DA, Levinson AJ, Garside S. Method and reporting quality in health  
36 366 professions education research: a systematic review. Med Educ. 2011  
37 367 Mar;45(3):227-38. doi: 10.1111/j.1365-2923.2010.03890.  
38  
39  
40  
41  
42  
43  
44  
45  
46  
47  
48  
49  
50  
51  
52  
53  
54  
55  
56  
57  
58  
59  
60

1  
2  
3  
4  
5  
6  
7  
8 1 **Quality of randomised controlled trials in medical**  
9 2 **education reported between 2012 and 2013: A**  
10 3 **systematic review protocol.**  
11 4  
12 5  
13 6

14 7 Martin G. Tolsgaard, MD, PhD<sup>1</sup>, Cheryl Ku, MSci<sup>2</sup>, Nicole N. Woods, PhD<sup>3</sup>,  
15 8 Kulamakan Mahan Kulasegaram, PhD<sup>4</sup>, Ryan Brydges, PhD<sup>5</sup>, Charlotte Ringsted,  
16 9 MD, PhD, MHPE<sup>7</sup>.

17 10  
18 11 <sup>1</sup> Centre for Clinical Education and the Juliane Marie Centre, Copenhagen  
19 12 University Hospital Rigshospitalet, Denmark.

20 13  
21 14 <sup>2</sup> The Wilson Centre, University of Toronto and University Health Network,  
22 15 Canada.

23 16  
24 17 <sup>3</sup> Department of Surgery and The Wilson Centre, University of Toronto and  
25 18 University Health Network, Canada

26 19  
27 20 <sup>4</sup> Department of Family and Community Medicine and The Wilson Centre,  
28 21 University of Toronto and University Health Network, Canada

29 22  
30 23 <sup>5</sup> Department of Medicine and The Wilson Centre, University of Toronto and  
31 24 University Health Network, Canada

32 25  
33 26 <sup>6</sup> Surgical Divisions, Neuroscience, & Medical Education, Health Sciences Library,  
34 27 University Health Network, Toronto General Hospital, Canada.

35 28  
36 29 <sup>7</sup> Department of Anesthesia and The Wilson Centre, University of Toronto and  
37 30 University Health Network, Canada

38 31  
39 32 Running head: Quality of randomised controlled trials in medical education.

40 33  
41 34 | Conflicts of interest: None of the authors report any conflicts of interest.

42 35  
43 36 Corresponding author:

44 37 Martin G. Tolsgaard, MD, PhD

45 38 Postdoctoral research fellow, Centre for Clinical Education and the Juliane Marie  
46 39 Center, Copenhagen University Hospital Rigshospitalet

47 40 9 Blegdamsvej, 2100 Copenhagen-O

48 41 Denmark

49 42 Tel: +456103072

50 43 [martintolsgaard@gmail.com](mailto:martintolsgaard@gmail.com)

51 44  
52 45  
53 46 Word count: XXX

54 47 Keywords: Randomised controlled trials, medical education



## Abstract

*Introduction:* Research in medical education has increased in volume over the last decades but concerns have been raised regarding the quality of trials conducted within this field. Randomised controlled trials (RCTs) involving educational interventions that are reported in biomedical journals have been criticised for insufficient conceptual, theoretical framework. RCTs published in journals dedicated to medical education, on the other hand, have been questioned regarding their methodological rigor.

The aim of this study is therefore to assess the quality of RCTs of educational interventions reported in 2012 and 2013 in journals dedicated to medical education compared to biomedical journals with respect to objective quality criteria.

*Methods and analysis:* RCTs published between 1 January 2012 and 31 December 2013 in English are included. The search strategy is developed by the help of experienced librarians to search online databases for key terms. All of the identified RCTs are screened based on their titles and abstracts individually by the authors and then compared in pairs to assess agreement. Data is extracted from the included RCTs by independently scoring each RCT using a data collection form. The data collection form consists of four steps. Step 1 includes confirmation of RCT eligibility; Step 2 consists of the CONSORT checklist; Step 3 consists of the MERSQI framework; Step 4 consists of a Medical Education Extension (MEdEx) to the CONSORT checklist. The MEdEx includes the following elements: Description of scientific background, explanation of rationale, quality of research questions and hypotheses, clarity in the description of the use of the intervention and control as well as interpretation of results.

*Ethics and Dissemination:* This review is the first to systematically examine the quality of RCTs conducted in medical education. We plan to disseminate the results through publications and presentation at relevant conferences. Ethical approval is not sought for this review.

## Article summary

### *Strengths and Limitations of this study*

#### *Strengths:*

- The first systematic review of the quality of randomised controlled trials in medical education.
- The use of duplicate, independent, and reproducible data coding of quality measures pertaining to research methodology and reporting.

#### *Limitations:*

- To provide a current state of evidence on trial quality, only studies reported from 2012 to 2013 are included in this review.
- Only articles in English are included in this systematic review.

## 93 Introduction

94 Medical education as a field has grown during the past twenty years. It has  
95 become a billion dollar industry accounting for about US\$100 billion per year  
96 worldwide<sup>1</sup> and increasing awareness of linking education to patient outcomes  
97 has brought focus on evidence-based medical education.<sup>2</sup> The growing interest is  
98 reflected in the rise in number of publications within this area over the past  
99 several decades.<sup>3</sup> However, this is not unproblematic, as several scholars have  
100 warned that the medical education research lacks methodological rigor.<sup>3</sup> In a  
101 study of randomised controlled trials (RCTs) published between 2000 and 2003,  
102 a large proportion fell short of the criteria developed by the International  
103 Committee of Medical Journal Editors for reporting RCTs.<sup>4</sup> Meanwhile, some  
104 argue that judging the quality of research being performed in medical education  
105 by any 'objective' checklist is insufficient.<sup>5</sup> Instead, quality of medical education  
106 research should be based on ~~how well the~~ the advancement of our theoretical  
107 ~~understanding of a problem becomes~~, rather than on how well a particular  
108 research methodology has been adopted.<sup>5</sup> Other viewpoints state that whatever  
109 method is used should comply with the highest standards of practice for that  
110 design.<sup>6</sup> Thus, two discourses of evaluating quality have been promoted. One is  
111 assessing quality against 'gold-standards' such as the checklists and guidelines,  
112 and another is judging the advancement of theory.

113 In clinical epidemiological research, RCTs take on a central role when evaluating  
114 health care interventions. Since 2000, the CONSORT group has provided  
115 guidelines to improve the transparency and rigor when reporting randomised  
116 trials within biomedicine.<sup>7</sup> Although the CONSORT statement does not include

Formatted: Superscript

1  
2  
3  
4  
5  
6 117 recommendations for designing, conducting, and analysing trials, it indirectly  
7  
8 118 affects design and conduct as transparent reporting may expose deficiencies in  
9  
10 119 research if they exist<sup>7</sup> Furthermore, CONSORT is informed by methodological  
11  
12 120 theorists and practitioners in clinical epidemiology as well as biostatistics.  
13  
14 121 Assessing quality of RCTs in medical education using the CONSORT statement  
15  
16 122 may, however, not capture advancement of theory. Insufficient use of a  
17  
18 123 conceptual theoretical framework may lead to failure to identify the active  
19  
20 124 component of training interventions. ~~Furthermore, and~~ poor description of  
21  
22 125 context of the study as well as trainee characteristics limit the external validity in  
23  
24 126 terms of generalizability to other settings and populations. Reporting should  
25  
26 127 therefore also relate the study to a relevant theoretical context to justify how it  
27  
28 128 uses and advances existing theory<sup>5</sup> including thorough descriptions of context,  
29  
30 129 educational intervention and control circumstances, and trainee characteristics.<sup>8</sup>  
31  
32 130 However, these aspects are not assessed using the CONSORT statement and  
33  
34 131 other measures to evaluate study quality within medical education research may  
35  
36 132 be warranted. To further evolve our understanding of quality of RCTs conducted  
37  
38 133 in medical education, we aim to explore the adherence to standardised quality  
39  
40 134 criteria as well as the use of theory in recent literature. The research question of  
41  
42 135 this review is:  
43  
44 136  
45  
46 137 In randomised controlled trials in medical education reported between 2012 and  
47  
48 138 2013, what characterises the quality of papers published in journals dedicated to  
49  
50 139 medical education compared to papers published in biomedical journals with  
51  
52 140 respect to objective quality criteria?  
53  
54 141  
55  
56  
57  
58  
59  
60

## 142 Methods

143 This systematic review is designed according to the seven-step approach  
144 recommended for conducting systematic reviews in medical education<sup>2</sup> and  
145 reported according to the PRISMA statement.<sup>9</sup>

### 147 Study eligibility

148 Broad inclusion criteria are used to obtain a broad range of randomised trials in  
149 medical education. Studies published between 1 January 2012 and 31 December  
150 2013 in English are included. This period is chosen as new guidelines for  
151 reporting randomised trials were published in June 2010 and previous studies  
152 argued that the evaluation of reporting guidelines should first be evaluated 18-  
153 24 months following publication.<sup>10-11</sup> All research papers in medical education  
154 using randomised designs are included. Medical education research is defined as  
155 “any original research study pertaining to medical students, residents, fellows,  
156 faculty development, or continuing medical education for physicians.”<sup>12</sup> Using  
157 this definition, studies on veterinary-, nursing-, pharmacist-, physiotherapist-  
158 and dentistry education research are not eligible. Parallel group studies, cross-  
159 over studies, non-inferiority and equivalence studies are all included whereas  
160 pseudo-randomised studies are not.

### 162 Search

163 The search strategy is developed by the help of experienced librarians to search  
164 MEDLINE, EMBASE, CINAHL, PsychINFO, ERIC, Web of Science, and Scopus for  
165 key terms. These terms include truncated search on random\* and MeSH terms

1  
2  
3  
4  
5  
6 166 relating to medical education (e.g. "Education, Professional"). Related domains  
7  
8 167 are also included in the search to account for research not categorised under  
9  
10 168 medical education (e.g. health professions education, simulation, undergraduate  
11  
12 169 medical education, technology-enhanced education, clinical reasoning, skills  
13  
14 170 assessment, education professional, student health occupation, internship and  
15  
16 171 residency, curriculum planning, instructional method, self-directed learning etc.).  
17  
18 172 The search is supplemented by adding the reference-lists of recent reviews in  
19  
20 173 simulation-based medical education and with authors' records of studies  
21  
22 174 published in the period of interest. The authors' records are used to refine the  
23  
24 175 search strategy in an iterative way so that as many relevant randomised studies  
25  
26 176 as possible are included in the online search.  
27

28 177

### 31 178 **Study selection**

32  
33 179 All of the identified studies are screened based on their titles and abstracts  
34  
35 180 individually and compared in pairs to assess agreement so that all studies have  
36  
37 181 been screened by two authors. Potential disagreement is solved by discussion  
38  
39 182 until consensus is reached. If the title or abstract is insufficient for determining  
40  
41 183 eligibility, the full text is reviewed. If consensus cannot be reached by two of the  
42  
43 184 co-authors, the whole author team will decide whether to include the paper or  
44  
45 185 not. The agreement between the raters is determined using intra-class  
46  
47 186 correlation coefficients (ICCs).  
48

49 187

1  
2  
3  
4  
5  
6 188 **Data collection process**  
7

8 189 Data is extracted from included studies by duplicate and independent scoring of  
9  
10 190 each study using a data collection form. The data collection form consists of four  
11  
12 191 steps. Step 1 includes confirmation of study eligibility; Step 2 consists of the  
13  
14 192 CONSORT checklist; Step 3 consists of the Medical Education Research Study  
15  
16 193 Quality Instrument (MERSQI) framework; Step 4 consists of a Medical Education  
17  
18 194 Extension to the CONSORT statement developed by the review group.  
19

20 195

21  
22 196 *Step 1.* The first step includes confirmation of study eligibility, extraction of  
23  
24 197 Study ID (created by review author) as well as name and focus of journal  
25  
26 198 (medical education/biomedical).  
27

28 199 *Step 2.* The dichotomous CONSORT checklist is completed by ticking off each  
29  
30 200 item when either present (=1), absent (=0), or not applicable (N/A). The  
31  
32 201 CONSORT statement recommends that researchers provide a scientific  
33  
34 202 background for the study as well as present specific objectives and hypothesis,  
35  
36 203 thoroughly describe the intervention and control conditions, randomisation  
37  
38 204 procedure, data analysis and interpretation of results.

39  
40 205 Step 3. The Jadad Scale for reporting randomised trials<sup>13</sup> is used to assess the  
41  
42 206 methodological rigor of the included studies. The Jadad scale consists of three  
43  
44 207 items pertaining to randomisation procedure, blinding, and participant  
45  
46 208 withdrawal or dropouts.  
47

48 209 *Step 4.* The Medical Education Research Study Quality Instrument (MERSQI)<sup>12</sup> is  
49  
50 210 used to provide an established measure of study quality and scores are  
51  
52 211 compared in pairs and discussed until consensus. Evidence of validity of the  
53  
54 212 MERSQI framework has been established in a previous study.<sup>12</sup> The MERSQI  
55  
56  
57  
58  
59  
60

Formatted: Superscript

213 framework provides a measure of trial size (single- or multiple institutions),  
 214 validity of assessment instruments used, and the Kirkpatrick level of outcome  
 215 measures used (a taxonomy for classifying training programmes). Hence, studies  
 216 of a certain size and focusing on patient outcomes would receive higher scores  
 217 than single-institution studies that assess the impact of interventions on health  
 218 care professionals' knowledge or behaviour in a simulated setting.

219 *Step 54.* The Medical Education Extension (MEdEx) is developed by the study  
 220 group through a literature review of relevant quality research in medical  
 221 education. To further advance our understanding of the use of theory in the  
 222 scientific background of the RCTs, the reporting of specific hypotheses, clarity of  
 223 description of interventions<sup>143</sup> and controls, and the use of theory in the  
 224 interpretation of the observed results, we chose to include these factors in a  
 225 medical education extension (MEdEx) to the CONSORT checklist. In step 4, the  
 226 following items are therefore included: 1) Scientific background,<sup>5</sup> 2) Explanation  
 227 of rationale,<sup>5</sup> 3) Objectives or research question,<sup>4, 6</sup> 4) Hypotheses,<sup>4, 6</sup> 5)  
 228 Description of the intervention and control circumstances,<sup>6, 8, 14</sup> 6)  
 229 Interpretation<sup>4, 5, 12</sup> of results (see Appendix).

230

### 231 **Statistical analysis**

232 Inter-rater reliability is calculated using Intra-Class Correlation Coefficients. In  
 233 the event of disagreement, the assessments will be solved by consensus.

234 Descriptive statistics for each of the three different quality measures will be  
 235 performed. Logistic regression will be performed using journal type as  
 236 dependent and The CONSORT-scores, MERSQI-scores, and and-MEdEx-scores as

Formatted: Superscript

1  
2  
3  
4  
5  
6 237 ~~predictor variables.- Multiple regression using the same predictor variables and~~  
7  
8 238 ~~journal impact factor will also be performed to assess the relation between~~  
9  
10 239 ~~quality measures and journal impact factor. are correlated to each other, to~~  
11  
12 240 ~~journal impact factor, and compared across papers published in journals~~  
13  
14 241 ~~dedicated to medical education and biomedical journals using parametric~~  
15  
16 242 ~~statistics if the conditions are met.~~  
17  
18 243

## 20 244 Discussion and dissemination

21  
22  
23 245 In parallel with the rise in publications in medical education over the last  
24  
25 246 decades, increasing interest is being paid to systematically evaluate the quality of  
26  
27 247 research conducted within this field. We chose to include three different quality  
28  
29 248 measures in the data collection form for this systematic review. To evaluate the  
30  
31 249 quality of reporting, the CONSORT checklist is included as a measure of the  
32  
33 250 degree to which current medical education research adhere to the guidelines  
34  
35 251 endorsed by the *World Association of Medical Editors, the International*  
36  
37 252 *Committee of Medical Journal Editors (ICMJE), and the Council of Science*  
38  
39 253 *Editors.*<sup>154</sup> The second quality measure includes the MERSQI framework, which  
40  
41 254 has been used extensively in several recent reviews.<sup>165-187</sup> Although MERSQI-  
42  
43 255 scores have been shown to correlate with journal impact factor,<sup>12</sup> it provides  
44  
45 256 limited information on the use of theory or clarity in the description of  
46  
47 257 interventions. Hence, to account for the use of conceptual theoretical  
48  
49 258 frameworks in medical education RCTs, we plan to include a third quality  
50  
51 259 measure in terms of the MEdEx framework.  
52  
53 260



1  
2  
3  
4  
5  
6 261 We hypothesise that this review may demonstrate differences between different  
7  
8 262 quality measures in RCTs reported in biomedical journals compared to those  
9  
10 263 published in journals dedicated to medical education. We expect that RCTs  
11  
12 264 reported in biomedical journals adhere more strictly to the CONSORT statement  
13  
14 265 and use outcome measures that relate to the upper Kirkpatrick levels than RCTs  
15  
16 266 reported in medical education journals. Finally, we hypothesise that RCTs  
17  
18 267 published in medical education journals use theory in the rationale for their  
19  
20 268 research question, methods, and in their interpretation of the results, whereas  
21  
22 269 this may be missing in research published in biomedical or clinical journals.

23  
24 270 The review results will be submitted for publication in a peer-reviewed general  
25  
26 271 medical journal and will be disseminated through relevant international  
27  
28 272 conferences.

29  
30 273 The results of this review will help clarify the state of quality of education  
31  
32 274 research by using common quality standards. The comparative analysis with  
33  
34 275 clinical epidemiology will provide feedback for ~~the medical education~~  
35  
36 276 ~~community~~ medical education researchers and contribute to raising the quality of  
37  
38 277 research and improve the reporting of studies within this field.

39  
40  
41 278

42 279 *Funding statement:* This review has been supported by the Laerdal Foundation.

43  
44 280

45  
46 281 *Competing interest statement:* None disclosed.

47  
48 282

49  
50 283 *Contribution statement:* All authors contributed to the design of the review and  
51  
52 284 all authors contributed and approved the final manuscript. Everyone listed as an  
53  
54 285 author fulfils all three of the ICMJE guidelines for authorship. MGT and CR were

1  
2  
3  
4  
5  
6 286 responsible for conception of the review. CK, KMK, RB, NW, MGT, and CR were  
7  
8 287 responsible for designing the review and the MEdEx. MGT drafted the first  
9  
10 288 version of the protocol and CK, RB, NW, KMK, and CR were critically revised the  
11  
12 289 paper.

13  
14 290 ~~Contributors: All authors contributed to the design of the review and all authors~~  
15  
16 291 ~~contributed and approved the final manuscript.~~  
17  
18 292  
19  
20 293  
21  
22 294  
23  
24 295  
25  
26 296  
27  
28 297  
29  
30 298  
31  
32 299

## 33 34 299 References

35  
36 300  
37  
38  
39 301 1) Frenk J, Chen L, Bhutta ZA, Cohen J, Crisp N, Evans T, Fineberg H, Garcia P, Ke  
40  
41 302 Y, Kelley P, Kistnasamy B, Meleis A, Naylor D, Pablos-Mendez A, Reddy S,  
42  
43 303 Scrimshaw S, Sepulveda J, Serwadda D, Zurayk H. Health professionals for a new  
44  
45 304 century: transforming education to strengthen health systems in an  
46  
47 305 interdependent world.Lancet. 2010 Dec 4;376(9756):1923-58.  
48  
49 306

- 1  
2  
3  
4  
5  
6 307 2) Cook DA, West CP. Conducting systematic reviews in medical education: a  
7  
8 308 stepwise approach. *Med Educ*. 2012 Oct;46(10):943-52. doi: 10.1111/j.1365-  
9  
10 309 2923.2012.04328.x.  
11  
12 310  
13  
14 311 3) Lee K, Whelan JS, Tannery NH, Kanter SL, Peters AS. 50 years of publication in  
15  
16 312 the field of medical education. *Med Teach*. 2013 Apr 22  
17  
18 313  
19  
20 314 4) Todres M, Stephenson A, Jones R. Medical education research remains the  
21  
22 315 poor relation. *BMJ* 2007;335:335-5.  
23  
24 316  
25  
26 317 5) Eva KW. *Med Educ*. Broadening the debate about quality in medical education  
27  
28 318 research. 2009 Apr;43(4):294-6. doi: 10.1111/j.1365-2923.2009.03342.x.  
29  
30 319  
31  
32 320 6) Stephenson A, Todres M, Jones R. Reply to Dornan et al.'s 'On evidence'. *Med*  
33  
34 321 *Educ*. 2009 Apr;43(4):390-1. doi: 10.1111/j.1365-2923.2009.03306.x.  
35  
36 322  
37  
38 323 7) Schulz KF, Altman DG, Moher D; CONSORT Group .CONSORT 2010 statement:  
39  
40 324 updated guidelines for reporting parallel group randomized trials. *Ann Intern*  
41  
42 325 *Med*. 2010 Jun 1;152(11):726-32. doi: 10.1059/0003-4819-152-11-201006010-  
43  
44 326 00232. Epub 2010 Mar 24.  
45  
46 327  
47  
48 328 8) Frambach JM, van der Vleuten CP, Durning SJ. AM last page. Quality criteria in  
49  
50 329 qualitative and quantitative research. *Acad Med*. 2013 Apr;88(4):552. doi:  
51  
52 330 10.1097/ACM.0b013e31828abf7f.  
53  
54 331  
55  
56  
57  
58  
59  
60

1  
2  
3  
4  
5  
6 332 9) Prisma statement, available at [www.prisma-statement.org](http://www.prisma-statement.org). Accessed 5  
7  
8 333 January 2014.

9  
10 334

11 335 10) Prady SL, Richmond SJ, Morton VM, et al. A Systematic evaluation of the  
12  
13 336 impact of STRICTA and CONSORT recommendations on quality of reporting for  
14  
15 337 acupuncture trials. *PLoS One* 2008;3:e1577.

16  
17  
18 338

19  
20 339 11) Fuller T, Pearson M, Peters JL, Anderson R. Evaluating the impact and use of  
21  
22 340 Transparent Reporting of Evaluations with Non-randomised Designs (TREND)  
23  
24 341 reporting guidelines. *BMJ Open*. 2012 Dec 19;2(6). pii: e002073. doi:  
25  
26 342 10.1136/bmjopen-2012-002073. Print 2012.

27  
28 343

29  
30 344

31  
32 345 ~~122~~) Reed DA, Cook DA, Beckman TJ, Levine RB, Kern DE, Wright SM. Association  
33  
34 346 between funding and quality of published medical education research. *JAMA*.  
35  
36 347 2007 Sep 5;298(9):1002-9.

37  
38 348

39  
40 349 [13\) Jadad AR1, Moore RA, Carroll D, Jenkinson C, Reynolds DJ, Gavaghan DJ,](#)

41  
42 350 [McQuay HJ. Assessing the quality of reports of randomized clinical trials: is](#)

43  
44 351 [blinding necessary? \*Control Clin Trials\*. 1996;17\(1\):1-12.](#)

45  
46 352

47  
48 353 ~~143~~) Hoffmann TC, Eructi C, Glasziou PP. Poor description of non-

49  
50 354 pharmacological

51  
52 355 interventions: analysis of consecutive sample of randomised trials. *BMJ*. 2013

53  
54 356 Sep 10;347:f3755. doi: 10.1136/bmj.f3755

1  
2  
3  
4  
5  
6 357  
7

8 358 | 154) Altman DG. Endorsement of the CONSORT statement by high impact  
9  
10 359 | medical journals: survey of instructions for authors. BMJ. 2005 May  
11  
12 360 | 7;330(7499):1056-7.  
13

14 361

15  
16 362 | 165) Cook DA, Hatala R, Brydges R, Zendejas B, Szostek JH, Wang AT, Erwin PJ,  
17  
18 363 | Hamstra SJ. Technology-enhanced simulation for health professions education: a  
19  
20 364 | systematic review and meta-analysis. JAMA. 2011 Sep 7;306(9):978-88. doi:  
21  
22 365 | 10.1001/jama.2011.1234. Review.  
23

24 366

25  
26 367 | 176) Cook DA, Brydges R, Zendejas B, Hamstra SJ, Hatala R. Mastery learning for  
27  
28 368 | health professionals using technology-enhanced simulation: a systematic review  
29  
30 369 | and meta-analysis. Acad Med. 2013 Aug;88(8):1178-86. doi:  
31  
32 370 | 10.1097/ACM.0b013e31829a365d. Review.  
33

34 371

35  
36 372 | 187) Cook DA, Levinson AJ, Garside S. Method and reporting quality in health  
37  
38 373 | professions education research: a systematic review. Med Educ. 2011  
39  
40 374 | Mar;45(3):227-38. doi: 10.1111/j.1365-2923.2010.03890.x.

41  
42 375

43  
44 376  
45  
46  
47  
48  
49  
50  
51  
52  
53  
54  
55  
56  
57  
58  
59  
60

## Appendix 1.

## Extension to the CONSORT statement

The column on the left-hand side is selected CONSORT elements. The column on the right represents the coding extensions specific for this study. All of these additional items are rated on three-point scales.

|                                                                     |                                                                                                                                                                                                                                                                                                                                                                                                                                                                                                                                                                                                                                                                                                                                                                                                                                                                                                                                                                                                                                                                                                                                                                             |
|---------------------------------------------------------------------|-----------------------------------------------------------------------------------------------------------------------------------------------------------------------------------------------------------------------------------------------------------------------------------------------------------------------------------------------------------------------------------------------------------------------------------------------------------------------------------------------------------------------------------------------------------------------------------------------------------------------------------------------------------------------------------------------------------------------------------------------------------------------------------------------------------------------------------------------------------------------------------------------------------------------------------------------------------------------------------------------------------------------------------------------------------------------------------------------------------------------------------------------------------------------------|
| <p><b>2a Scientific background and explanation of rationale</b></p> | <ul style="list-style-type: none"> <li>• <u>Scientific background</u> (maximum score = 3) include the use of               <ol style="list-style-type: none"> <li>1) Educational instruments. Score = 1.0 <i>Example: Simulation-based medical education, use of assessment instruments with validity evidence.</i></li> <li>2) Educational concepts. Score = 1.0 <i>Example: Deliberate practice, self-directed learning.</i></li> <li>3) Educational theories. Score = 1.0 <i>Example: Cognitive load theory, developmental frameworks.</i></li> </ol> </li> <li>• <u>Explanation of rationale</u> is the clinical rationale or justification for conducting the study. Maximum score = 3.               <ol style="list-style-type: none"> <li>1) Clinical background. Score = 1.5. <i>Example: "laparoscopic surgery has long learning curves and complications occurs more frequently with inexperienced surgeons."</i></li> <li>2) Justification of the use of intervention. Score = 1.5. <i>Example: "Simulation-based training has been shown to be useful for initial training and may therefore reduce the number of complications..."</i></li> </ol> </li> </ul> |
| <p><b>2b Specific objectives or hypotheses</b></p>                  | <ul style="list-style-type: none"> <li>• <u>Objectives or research question</u> (maximum score = 3) include specifications of               <ol style="list-style-type: none"> <li>1) Setting and population (Each = 0.5)</li> <li>2) Intervention and control (Each = 0.5)</li> <li>3) Outcome measures (Each = 0.1)</li> </ol> </li> <li>• <u>Hypotheses</u> are proposed effects or mechanisms of action.               <ol style="list-style-type: none"> <li>1) Score = 3 if stated clearly as a hypothesis <i>Example: Our hypothesis was that...</i></li> <li>2) Score 1.5 if potential mechanisms of actions are stated but not explicitly called a hypothesis <i>Example: "Simulation-based training has previously shown improved operative performances and may therefore also reduce complications..."</i></li> <li>3) Score=0 if no mechanism of action is proposed or no specific hypothesis is suggested.</li> </ol> </li> </ul>                                                                                                                                                                                                                             |

|                                                                                                                                                       |                                                                                                                                                                                                                                                                                                                                                                                                                                                                                                                                                                                                                                                                                                                                                                                                                                                                                                                                                                                     |
|-------------------------------------------------------------------------------------------------------------------------------------------------------|-------------------------------------------------------------------------------------------------------------------------------------------------------------------------------------------------------------------------------------------------------------------------------------------------------------------------------------------------------------------------------------------------------------------------------------------------------------------------------------------------------------------------------------------------------------------------------------------------------------------------------------------------------------------------------------------------------------------------------------------------------------------------------------------------------------------------------------------------------------------------------------------------------------------------------------------------------------------------------------|
|                                                                                                                                                       | <p>Example: Effective communication is difficult. We aimed to explore if a simulated patient programme improved students' confidence in...</p>                                                                                                                                                                                                                                                                                                                                                                                                                                                                                                                                                                                                                                                                                                                                                                                                                                      |
| <p><b>5 The interventions for each group with sufficient details to allow replication, including how and when they were actually administered</b></p> | <ul style="list-style-type: none"> <li>• <u>Description of the use of the intervention and control</u> (maximum score = 3) include             <ol style="list-style-type: none"> <li>1) Detailed description of the type of intervention and control conditions. Score = 1<br/><i>Example: Type of simulation or type of learner interaction.</i></li> <li>2) Detailed description of instructions/information available to participants. Score = 1<br/><i>Example: Verbal or written instructions available prior to and during the intervention and additional resources such as textbooks, web-based learning material etc.</i></li> <li>3) Detailed description of the supervision/ assessment/ feedback provided, the amounts available and the qualifications/training of the persons providing supervision/ assessment /feedback. Score = 1.<br/><i>Example: How much feedback was provided, how was it provided, by whom and for how much time?</i></li> </ol> </li> </ul> |
| <p><b>Interpretations</b></p>                                                                                                                         | <ul style="list-style-type: none"> <li>• <u>Interpretation of results</u> (maximum score = 3) includes             <ol style="list-style-type: none"> <li>1) Reported consistent with the observed results (Score = 1.5).<br/><i>Example: "These significantly higher performance-scores suggest that simulation-training of junior surgeons may lead to superior performance in the OR".</i></li> <li>2) Integration of results and interpretation into existing educational theory. (Score = 1.5)<br/><i>Example: "These results are consistent with cognitive load theory suggesting that..."</i></li> </ol> </li> </ul>                                                                                                                                                                                                                                                                                                                                                         |

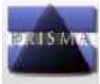

# PRISMA 2009 Checklist

1  
2  
3  
4  
5  
6  
7  
8  
9  
10  
11  
12  
13  
14  
15  
16  
17  
18  
19  
20  
21  
22  
23  
24  
25  
26  
27  
28  
29  
30  
31  
32  
33  
34  
35  
36  
37  
38  
39  
40  
41  
42  
43  
44  
45  
46  
47  
48  
49

| Section/topic             | #  | Checklist item                                                                                                                                                                                                                                                                                              | Reported on page #                                                                   |
|---------------------------|----|-------------------------------------------------------------------------------------------------------------------------------------------------------------------------------------------------------------------------------------------------------------------------------------------------------------|--------------------------------------------------------------------------------------|
| <b>TITLE</b>              |    |                                                                                                                                                                                                                                                                                                             |                                                                                      |
| Title                     | 1  | Identify the report as a systematic review, meta-analysis, or both.                                                                                                                                                                                                                                         | 1                                                                                    |
| <b>ABSTRACT</b>           |    |                                                                                                                                                                                                                                                                                                             |                                                                                      |
| Structured summary        | 2  | Provide a structured summary including, as applicable: background; objectives; data sources; study eligibility criteria, participants, and interventions; study appraisal and synthesis methods; results; limitations; conclusions and implications of key findings; systematic review registration number. | 2                                                                                    |
| <b>INTRODUCTION</b>       |    |                                                                                                                                                                                                                                                                                                             |                                                                                      |
| Rationale                 | 3  | Describe the rationale for the review in the context of what is already known.                                                                                                                                                                                                                              | 3                                                                                    |
| Objectives                | 4  | Provide an explicit statement of questions being addressed with reference to participants, interventions, comparisons, outcomes, and study design (PICOS).                                                                                                                                                  | 4                                                                                    |
| <b>METHODS</b>            |    |                                                                                                                                                                                                                                                                                                             |                                                                                      |
| Protocol and registration | 5  | Indicate if a review protocol exists, if and where it can be accessed (e.g., Web address), and, if available, provide registration information including registration number.                                                                                                                               | N/A – not subject for registration with PROSPERO as this is a methodological review. |
| Eligibility criteria      | 6  | Specify study characteristics (e.g., PICOS, length of follow-up) and report characteristics (e.g., years considered, language, publication status) used as criteria for eligibility, giving rationale.                                                                                                      | 4                                                                                    |
| Information sources       | 7  | Describe all information sources (e.g., databases with dates of coverage, contact with study authors to identify additional studies) in the search and date last searched.                                                                                                                                  | 5                                                                                    |
| Search                    | 8  | Present full electronic search strategy for at least one database, including any limits used, such that it could be repeated.                                                                                                                                                                               | 6                                                                                    |
| Study selection           | 9  | State the process for selecting studies (i.e., screening, eligibility, included in systematic review, and, if applicable, included in the meta-analysis).                                                                                                                                                   | 6                                                                                    |
| Data collection process   | 10 | Describe method of data extraction from reports (e.g., piloted forms, independently, in duplicate) and any processes for obtaining and confirming data from investigators.                                                                                                                                  | 7                                                                                    |
| Data items                | 11 | List and define all variables for which data were sought (e.g., PICOS, funding sources) and any assumptions and simplifications made.                                                                                                                                                                       | 8                                                                                    |



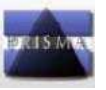

# PRISMA 2009 Checklist

1  
2  
3  
4  
5  
6  
7  
8  
9  
10  
11  
12  
13  
14  
15  
16  
17  
18  
19  
20  
21  
22  
23  
24  
25  
26  
27  
28  
29  
30  
31  
32  
33  
34  
35  
36  
37  
38  
39  
40  
41  
42  
43  
44  
45  
46  
47  
48  
49

|                                    |    |                                                                                                                                                                                                                        |     |
|------------------------------------|----|------------------------------------------------------------------------------------------------------------------------------------------------------------------------------------------------------------------------|-----|
| Risk of bias in individual studies | 12 | Describe methods used for assessing risk of bias of individual studies (including specification of whether this was done at the study or outcome level), and how this information is to be used in any data synthesis. | 8   |
| Summary measures                   | 13 | State the principal summary measures (e.g., risk ratio, difference in means).                                                                                                                                          | 8   |
| Synthesis of results               | 14 | Describe the methods of handling data and combining results of studies, if done, including measures of consistency (e.g., $I^2$ ) for each meta-analysis.                                                              | N/A |

| Section/topic                 | #  | Checklist item                                                                                                                                                                                           | Reported on page # |
|-------------------------------|----|----------------------------------------------------------------------------------------------------------------------------------------------------------------------------------------------------------|--------------------|
| Risk of bias across studies   | 15 | Specify any assessment of risk of bias that may affect the cumulative evidence (e.g., publication bias, selective reporting within studies).                                                             | 8                  |
| Additional analyses           | 16 | Describe methods of additional analyses (e.g., sensitivity or subgroup analyses, meta-regression), if done, indicating which were pre-specified.                                                         | N/A                |
| <b>RESULTS</b>                |    |                                                                                                                                                                                                          |                    |
| Study selection               | 17 | Give numbers of studies screened, assessed for eligibility, and included in the review, with reasons for exclusions at each stage, ideally with a flow diagram.                                          | N/A                |
| Study characteristics         | 18 | For each study, present characteristics for which data were extracted (e.g., study size, PICOS, follow-up period) and provide the citations.                                                             | N/A                |
| Risk of bias within studies   | 19 | Present data on risk of bias of each study and, if available, any outcome level assessment (see item 12).                                                                                                | N/A                |
| Results of individual studies | 20 | For all outcomes considered (benefits or harms), present, for each study: (a) simple summary data for each intervention group (b) effect estimates and confidence intervals, ideally with a forest plot. | N/A                |
| Synthesis of results          | 21 | Present results of each meta-analysis done, including confidence intervals and measures of consistency.                                                                                                  | N/A                |
| Risk of bias across studies   | 22 | Present results of any assessment of risk of bias across studies (see Item 15).                                                                                                                          | N/A                |
| Additional analysis           | 23 | Give results of additional analyses, if done (e.g., sensitivity or subgroup analyses, meta-regression [see Item 16]).                                                                                    | N/A                |
| <b>DISCUSSION</b>             |    |                                                                                                                                                                                                          |                    |
| Summary of evidence           | 24 | Summarize the main findings including the strength of evidence for each main outcome; consider their relevance to key groups (e.g., healthcare providers, users, and policy makers).                     | N/A                |
| Limitations                   | 25 | Discuss limitations at study and outcome level (e.g., risk of bias), and at review-level (e.g., incomplete retrieval of identified research, reporting bias).                                            | N/A                |
| Conclusions                   | 26 | Provide a general interpretation of the results in the context of other evidence, and implications for future research.                                                                                  | N/A                |
| <b>FUNDING</b>                |    |                                                                                                                                                                                                          |                    |



# PRISMA 2009 Checklist

1  
2  
3  
4  
5  
6  
7  
8  
9  
10  
11  
12  
13  
14  
15  
16  
17  
18  
19  
20  
21  
22  
23  
24  
25  
26  
27  
28  
29  
30  
31  
32  
33  
34  
35  
36  
37  
38  
39  
40  
41  
42  
43  
44  
45  
46  
47  
48  
49

|         |    |                                                                                                                                            |    |
|---------|----|--------------------------------------------------------------------------------------------------------------------------------------------|----|
| Funding | 27 | Describe sources of funding for the systematic review and other support (e.g., supply of data); role of funders for the systematic review. | 10 |
|---------|----|--------------------------------------------------------------------------------------------------------------------------------------------|----|

From: Moher D, Liberati A, Tetzlaff J, Altman DG, The PRISMA Group (2009). Preferred Reporting Items for Systematic Reviews and Meta-Analyses: The PRISMA Statement. PLoS Med 6(6): e1000097. doi:10.1371/journal.pmed1000097

For more information, visit: [www.prisma-statement.org](http://www.prisma-statement.org).

Page 2 of 2

For peer review only
