# Supplementary material for: Quality of randomised controlled trials in medical education reported between 2012 and 2013: a systematic review protocol
Source: HighWire-hosted journal article supplement (doi:10.1136/bmjopen-2014-005155), 2014-07-01
Supplement: bmjopen-2014-005155supp_appendix.pdf [file bmjopen-2014-005155supp_appendix.pdf]

## Appendix 1.

### Extension to the CONSORT statement

| <p><i>The column on the left-hand side is selected CONSORT elements. The column on the right represents the coding extensions specific for this study. All of these additional items are rated on three-point scales.</i></p> |                                                                                                                                                                                                                                                                                                                                                                                                                                                                                                                                                                                                                                                                                                                                                                                                                                                                                                                                                                                                                                                                                                                                                                             |
|-------------------------------------------------------------------------------------------------------------------------------------------------------------------------------------------------------------------------------|-----------------------------------------------------------------------------------------------------------------------------------------------------------------------------------------------------------------------------------------------------------------------------------------------------------------------------------------------------------------------------------------------------------------------------------------------------------------------------------------------------------------------------------------------------------------------------------------------------------------------------------------------------------------------------------------------------------------------------------------------------------------------------------------------------------------------------------------------------------------------------------------------------------------------------------------------------------------------------------------------------------------------------------------------------------------------------------------------------------------------------------------------------------------------------|
| <p><b>2a Scientific background and explanation of rationale</b></p>                                                                                                                                                           | <ul style="list-style-type: none"> <li>• <u>Scientific background</u> (maximum score = 3) include the use of               <ol style="list-style-type: none"> <li>1) Educational instruments. Score = 1.0 <i>Example: Simulation-based medical education, use of assessment instruments with validity evidence.</i></li> <li>2) Educational concepts. Score = 1.0 <i>Example: Deliberate practice, self-directed learning.</i></li> <li>3) Educational theories. Score = 1.0 <i>Example: Cognitive load theory, developmental frameworks.</i></li> </ol> </li> <li>• <u>Explanation of rationale</u> is the clinical rationale or justification for conducting the study. Maximum score = 3.               <ol style="list-style-type: none"> <li>1) Clinical background. Score = 1.5. <i>Example: "laparoscopic surgery has long learning curves and complications occurs more frequently with inexperienced surgeons."</i></li> <li>2) Justification of the use of intervention. Score = 1.5. <i>Example: "Simulation-based training has been shown to be useful for initial training and may therefore reduce the number of complications..."</i></li> </ol> </li> </ul> |
| <p><b>2b Specific objectives or hypotheses</b></p>                                                                                                                                                                            | <ul style="list-style-type: none"> <li>• <u>Objectives or research question</u> (maximum score = 3) include specifications of               <ol style="list-style-type: none"> <li>1) Setting and population (Each = 0.5)</li> <li>2) Intervention and control (Each = 0.5)</li> <li>3) Outcome measures (Each = 0.1)</li> </ol> </li> <li>• <u>Hypotheses</u> are proposed effects or mechanisms of action.               <ol style="list-style-type: none"> <li>1) Score = 3 if stated clearly as a hypothesis <i>Example: Our hypothesis was that...</i></li> <li>2) Score 1.5 if potential mechanisms of actions are stated but not explicitly called a hypothesis <i>Example: "Simulation-based training has previously shown improved operative performances and may therefore also reduce complications..."</i></li> <li>3) Score=0 if no mechanism of action is proposed or no specific hypothesis is suggested.</li> </ol> </li> </ul>                                                                                                                                                                                                                             |

|                                                                                                                                                       |                                                                                                                                                                                                                                                                                                                                                                                                                                                                                                                                                                                                                                                                                                                                                                                                                                                                                                                                                                                     |
|-------------------------------------------------------------------------------------------------------------------------------------------------------|-------------------------------------------------------------------------------------------------------------------------------------------------------------------------------------------------------------------------------------------------------------------------------------------------------------------------------------------------------------------------------------------------------------------------------------------------------------------------------------------------------------------------------------------------------------------------------------------------------------------------------------------------------------------------------------------------------------------------------------------------------------------------------------------------------------------------------------------------------------------------------------------------------------------------------------------------------------------------------------|
|                                                                                                                                                       | <p>Example: Effective communication is difficult. We aimed to explore if a simulated patient programme improved students' confidence in...</p>                                                                                                                                                                                                                                                                                                                                                                                                                                                                                                                                                                                                                                                                                                                                                                                                                                      |
| <p><b>5 The interventions for each group with sufficient details to allow replication, including how and when they were actually administered</b></p> | <ul style="list-style-type: none"> <li>• <u>Description of the use of the intervention and control</u> (maximum score = 3) include             <ol style="list-style-type: none"> <li>1) Detailed description of the type of intervention and control conditions. Score = 1<br/><i>Example: Type of simulation or type of learner interaction.</i></li> <li>2) Detailed description of instructions/information available to participants. Score = 1<br/><i>Example: Verbal or written instructions available prior to and during the intervention and additional resources such as textbooks, web-based learning material etc.</i></li> <li>3) Detailed description of the supervision/ assessment/ feedback provided, the amounts available and the qualifications/training of the persons providing supervision/ assessment /feedback. Score = 1.<br/><i>Example: How much feedback was provided, how was it provided, by whom and for how much time?</i></li> </ol> </li> </ul> |
| <p><b>Interpretations</b></p>                                                                                                                         | <ul style="list-style-type: none"> <li>• <u>Interpretation of results</u> (maximum score = 3) includes             <ol style="list-style-type: none"> <li>1) Reported consistent with the observed results (Score = 1.5).<br/><i>Example: "These significantly higher performance-scores suggest that simulation-training of junior surgeons may lead to superior performance in the OR".</i></li> <li>2) Integration of results and interpretation into existing educational theory. (Score = 1.5)<br/><i>Example: "These results are consistent with cognitive load theory suggesting that..."</i></li> </ol> </li> </ul>                                                                                                                                                                                                                                                                                                                                                         |
